# Supplementary material for: CottonFGD: an integrated functional genomics database for cotton
Source: PubMed Central journal article supplement (PMC5465443; doi:10.1186/s12870-017-1039-x), 2017-06-08
Supplement: 12870_2017_1039_MOESM4_ESM.pdf [file 12870_2017_1039_MOESM4_ESM.pdf]

## **Addition File 4: Snapshots of the search module**

|                                                                                               |    |
|-----------------------------------------------------------------------------------------------|----|
| Figure S4-1: Snapshots of the Browse page: browse genes by genomic position.....              | 2  |
| Figure S4-2: Snapshots of the Browse page: browse genes by genetic marker.....                | 4  |
| Figure S4-3: Snapshots of the BLAST page.....                                                 | 6  |
| Figure S4-4: Snapshots of the Search page: search by gene ID/name.....                        | 7  |
| Figure S4-5: Snapshots of the Search page: search by domain or function annotations.<br>..... | 9  |
| Figure S4-6: Snapshots of the Search page: search by gene expression profiles. ....           | 11 |
| References.....                                                                               | 12 |

## Browse Genes in Cotton ?

By Genomic Position By Genetic Marker

### Options

Species Gossypium hirsutum, NAU Chromosome A01 Start 1000000 - 3000000 End Update

User specify genome location

### Show 150 Genes in Region A01:1,000,000-3,000,000 in *Gossypium hirsutum* (NAU assembly)

Select & Analysis Select & BLAST Select & Phylogenetic Tree Build Select & Store Search ⌵

| <input type="checkbox"/> | Gene ID     | Gene Name | Description                                                   | Start     | End       | Strand | Links                            |
|--------------------------|-------------|-----------|---------------------------------------------------------------|-----------|-----------|--------|----------------------------------|
| <input type="checkbox"/> | Gh_A01G0119 | ERF053    | Ethylene-responsive transcription factor ERF053               | 1,008,923 | 1,010,191 | +      | Structure; Domain; Homology; GO; |
| <input type="checkbox"/> | Gh_A01G0120 | RMA1H1    | E3 ubiquitin-protein ligase RMA1H1                            | 1,023,424 | 1,024,188 | -      | Structure; Domain; Homology; GO; |
| <input type="checkbox"/> | Gh_A01G0121 | UBC38     | Putative ubiquitin-conjugating enzyme E2 38                   | 1,041,997 | 1,044,247 | -      | Structure; Domain; Homology; GO; |
| <input type="checkbox"/> | Gh_A01G0122 | NA        | NA                                                            | 1,048,448 | 1,048,951 | -      | Structure; Domain; Homology; GO; |
| <input type="checkbox"/> | Gh_A01G0123 | NSE4A     | Non-structural maintenance of chromosomes element 4 homolog A | 1,053,235 | 1,055,912 | +      | Structure; Domain; Homology; GO; |
| <input type="checkbox"/> | Gh_A01G0124 | RPS5      | Disease resistance protein RPS5                               | 1,064,885 | 1,067,521 | +      | Structure; Domain; Homology; GO; |
| <input type="checkbox"/> | Gh_A01G0125 | At5g63020 | Probable disease resistance protein At5g63020                 | 1,081,116 | 1,083,758 | +      | Structure; Domain; Homology; GO; |
| <input type="checkbox"/> | Gh_A01G0126 | NA        | NA                                                            | 1,123,288 | 1,123,602 | +      | Structure; Domain; Homology; GO; |
| <input type="checkbox"/> | Gh_A01G0127 | NA        | NA                                                            | 1,124,825 | 1,125,130 | -      | Structure; Domain; Homology; GO; |
| <input type="checkbox"/> | Gh_A01G0128 | NA        | NA                                                            | 1,178,670 | 1,178,861 | -      | Structure; Domain; Homology; GO; |

Showing 1 to 10 of 150 rows 10 records per page < 1 2 3 4 5 ... 15 >

Result gene list table

### JBrowse View ?

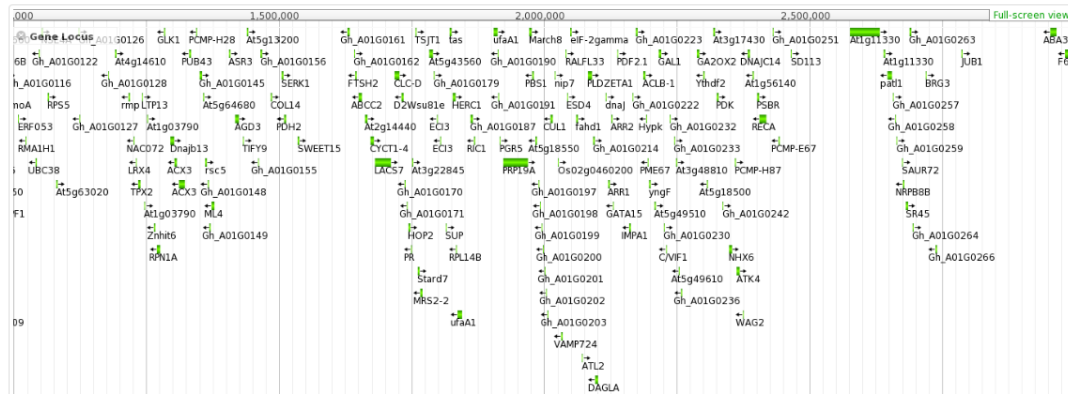

An embedded JBrowse view

**Figure S4-1: Snapshots of the Browse page: browse genes by genomic position.**

This snapshot displayed 150 genes in region A01:1,000,000-3,000,000 in *G. hirsutum* (NAU assembly), which was the default value when first visiting the Browse page.

## Browse Genes in Cotton ?

By Genomic Position    By Genetic Marker

### Options

Species: Gossypium hirsutum, NAU    Start Marker: JESPR0152    -    NAU3040    End Marker: Update

User specify a pair of genetic marker IDs

### Marker Information

|                                  | Start Marker                                                                                                                                                                                                                                                                                                                                                                                                                 | End Marker                                                                                                                                                                                                                                                                                                                                                                                                                                                                       |
|----------------------------------|------------------------------------------------------------------------------------------------------------------------------------------------------------------------------------------------------------------------------------------------------------------------------------------------------------------------------------------------------------------------------------------------------------------------------|----------------------------------------------------------------------------------------------------------------------------------------------------------------------------------------------------------------------------------------------------------------------------------------------------------------------------------------------------------------------------------------------------------------------------------------------------------------------------------|
| <b>ID</b>                        | JESPR0152                                                                                                                                                                                                                                                                                                                                                                                                                    | NAU3040                                                                                                                                                                                                                                                                                                                                                                                                                                                                          |
| <b>Alias</b>                     | JESPR152                                                                                                                                                                                                                                                                                                                                                                                                                     | <u>NA</u>                                                                                                                                                                                                                                                                                                                                                                                                                                                                        |
| <b>Type</b>                      | SSR                                                                                                                                                                                                                                                                                                                                                                                                                          | SSR                                                                                                                                                                                                                                                                                                                                                                                                                                                                              |
| <b>Source Species</b>            | <i>hirsutum</i>                                                                                                                                                                                                                                                                                                                                                                                                              | <i>raimondii</i>                                                                                                                                                                                                                                                                                                                                                                                                                                                                 |
| <b>Map</b>                       | AD-genome wide Reference Map (2009)                                                                                                                                                                                                                                                                                                                                                                                          | AD-genome wide Reference Map (2009)                                                                                                                                                                                                                                                                                                                                                                                                                                              |
| <b>Linkage Group</b>             | AD-genome wide Reference Map (2009).Ref-chr10                                                                                                                                                                                                                                                                                                                                                                                | AD-genome wide Reference Map (2009).Ref-chr15                                                                                                                                                                                                                                                                                                                                                                                                                                    |
| <b>Sequence</b>                  | GATGCACCAGATCCCTTTTATTAGTTTATAAGGATTACCAACTAAATAGAAGAAGAAGAAG<br>AAGAGGAAAGAAAGAAAGAAAGAAAGAAAGAAAGAAAGAAATAGAAAGAAAGAAAGAAAG<br>AAGAAGAAGAAGAAGAAGAAGAAGAAGAAGAAGAAGAAGAAGAAGAAGAAGAAGAAGAAG<br>AAGAAGAAGAAGAAAAGAAATGAAATACCCACTGTGATCCGATGTACC                                                                                                                                                                            | AAAAGCCGTGCTAACTGAATACAGTTCTTTTAGGCTTTTGCAACAGGGAAGCTTCTTCC<br>TTCCTTCTACAGTATGTCTTTTACTTATGTGAAATGTTTATAGGTTTCGAAATGCAAAA<br>ACTTGGACAATTACCGATTTCCAAGTTTTGCCATAAAGACTTTTTATCAGTCTCGATGATG<br>ATAAACCCGTAGTTTCGGGTGTTTGTGATT                                                                                                                                                                                                                                                    |
| <b>Primer 1</b>                  | GATGCACCAGATCCCTTTTATTAG                                                                                                                                                                                                                                                                                                                                                                                                     | AAAAGCCGTGCTAACTGAAT                                                                                                                                                                                                                                                                                                                                                                                                                                                             |
| <b>Primer 2</b>                  | GATGCACCAGATCCCTTTTATTAG                                                                                                                                                                                                                                                                                                                                                                                                     | AATCACAACACCCGAACT                                                                                                                                                                                                                                                                                                                                                                                                                                                               |
| <b>Physical Positions (Best)</b> | <ul style="list-style-type: none"> <li><i>Gossypium raimondii</i> (JGI): <u>NA</u></li> <li><i>Gossypium raimondii</i> (BGI): <u>NA</u></li> <li><i>Gossypium arboreum</i> (BGI): <u>NA</u></li> <li><i>Gossypium hirsutum</i> (BGI): scaffold238.1:1,447,946-1,448,279</li> <li><i>Gossypium hirsutum</i> (NAU): D01:59,289,789-59,290,090</li> <li><i>Gossypium barbadense</i> (NAU): D01:58,919,930-58,920,135</li> </ul> | <ul style="list-style-type: none"> <li><i>Gossypium raimondii</i> (JGI): Chr02:61,729,007-61,729,216</li> <li><i>Gossypium raimondii</i> (BGI): Chr02:1,035,849-1,036,058</li> <li><i>Gossypium arboreum</i> (BGI): Chr02:69,391,280-69,391,482</li> <li><i>Gossypium hirsutum</i> (BGI): A09:41,262,967-41,263,172</li> <li><i>Gossypium hirsutum</i> (NAU): D01:60,440,750-60,440,959</li> <li><i>Gossypium barbadense</i> (NAU): scaffold_1679.D01:156,016-156,225</li> </ul> |

Show marker information imported from CottonGen database

Show markers physical positions among cotton species

Continue on the next page...

## Continue the previous page ...

### Physical Position in Selected Genome

Filter By

Min. BLAT Query Coverage (%)

Min. BLAT Identity (%)

Max. Return Hit Number Per Marker

Show relevant marker position in genomes. The mapping parameters could be customized.

Selected Position: D01:59,289,789-59,290,090

Selected Position: D01:60,440,750-60,440,959

Select & Confirm Position

Start Marker: JESPR0152

| Chromosome                           | Start      | End        | Coverage | Identity |
|--------------------------------------|------------|------------|----------|----------|
| <input checked="" type="radio"/> D01 | 59,289,789 | 59,290,090 | 98.71    | 98.28    |

Showing 1 to 1 of 1 rows

End Marker: NAU3040

| Chromosome                           | Start      | End        | Coverage | Identity |
|--------------------------------------|------------|------------|----------|----------|
| <input checked="" type="radio"/> D01 | 60,440,750 | 60,440,959 | 100      | 98.1     |
| <input type="radio"/> A01            | 98,793,134 | 98,793,339 | 100      | 95.71    |

Showing 1 to 2 of 2 rows

Users should select positions they want.

### Confirm Your Selection & Fetch Genes

### Show 116 Genes in Region D01:59,289,789-60,440,959 in *Gossypium hirsutum* (NAU assembly)

Select & Analysis | Select & BLAST | Select & Phylogenetic Tree Build | Select & Store

| Gene ID                              | Gene Name | Description                                                          | Start      | End        | Strand | Links                       |
|--------------------------------------|-----------|----------------------------------------------------------------------|------------|------------|--------|-----------------------------|
| <input type="checkbox"/> Gh_D01G2029 | PSK6      | Putative phytolectin-like protein 6                                  | 59,308,542 | 59,309,042 | +      | Structure; Domain; Homology |
| <input type="checkbox"/> Gh_D01G2030 | At3g23620 | Ribosome production factor 2 homolog                                 | 59,310,810 | 59,312,600 | +      | Structure; Domain; Homology |
| <input type="checkbox"/> Gh_D01G2031 | FK        | Delta(14)-sterol reductase                                           | 59,313,576 | 59,319,041 | -      | Structure; Domain; Homology |
| <input type="checkbox"/> Gh_D01G2032 | HDT1      | Histone deacetylase HDT1                                             | 59,320,151 | 59,322,851 | +      | Structure; Domain; Homology |
| <input type="checkbox"/> Gh_D01G2033 | NA        | Enolase                                                              | 59,326,180 | 59,329,485 | -      | Structure; Domain; Homology |
| <input type="checkbox"/> Gh_D01G2034 | PRXIE     | Peroxisomal protein, chloroplastic                                   | 59,334,370 | 59,335,053 | +      | Structure; Domain; Homology |
| <input type="checkbox"/> Gh_D01G2035 | At5g12100 | Pentatricopeptide repeat-containing protein At5g12100, mitochondrial | 59,335,370 | 59,337,823 | -      | Structure; Domain; Homology |
| <input type="checkbox"/> Gh_D01G2036 | CSLA9     | Glucosyltransferase 9                                                | 59,340,699 | 59,345,467 | -      | Structure; Domain; Homology |
| <input type="checkbox"/> Gh_D01G2037 | NA        | NA                                                                   | 59,364,867 | 59,366,338 | +      | Structure; Domain; Homology |
| <input type="checkbox"/> Gh_D01G2038 | PXC1      | Leucine-rich repeat receptor-like protein kinase PXC1                | 59,380,005 | 59,382,115 | +      | Structure; Domain; Homology |

Showing 1 to 10 of 116 rows  records per page

...

Result gene list table

### JBrowse View

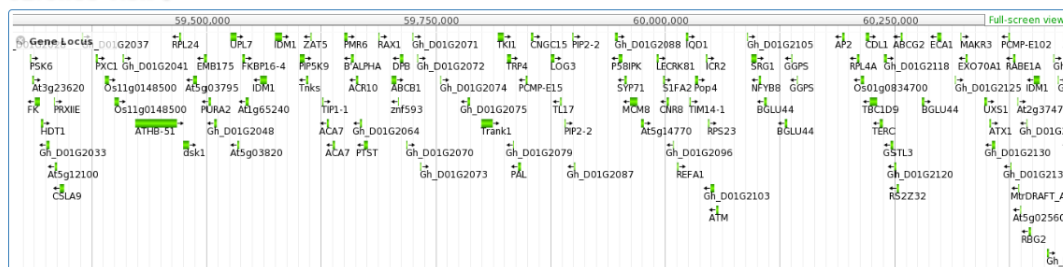

Figure S4-2: Snapshots of the Browse page: browse genes by genetic marker.

Since a single marker might map to multiple genomic locations, CottonFGD first displays all the possible mapped genomic locations to let users select the positions they want. By default, CottonFGD displays genomic locations that have  $\geq 95\%$  query coverage and  $\geq 90\%$  identity, which could be customized by users. Then CottonFGD

displays the result gene list table based on users' selections. This snapshot displayed 116 *G. hirsutum* genes (NAU assembly) between SSR marker JESPR0152 and NAU3040.

## BLAST: Search Homologous Genes/Proteins By Sequence Similarity

SequenceServer App.

Input query

Select database

Other parameters

BLAST results

### Result ID List

| Query ID | Hit ID        | Score   | Gene Name | Description                 | Species            | Assembly | Chromosome |
|----------|---------------|---------|-----------|-----------------------------|--------------------|----------|------------|
| CYP78A7  | Gh_D06G1909.1 | 1155.97 | CYP78A7   | Cytochrome P450 78A7        | Gossypium hirsutum | NAU      | D06        |
| CYP78A7  | Gh_A06G1538.1 | 1116.68 | CYP78A7   | Cytochrome P450 78A7        | Gossypium hirsutum | NAU      | A06        |
| CYP78A7  | Gh_D12G1591.1 | 94.36   | CYP78A5   | Cytochrome P450 78A5        | Gossypium hirsutum | NAU      | D12        |
| CYP78A7  | Gh_A12G1471.1 | 93.59   | CYP78A5   | Cytochrome P450 78A5        | Gossypium hirsutum | NAU      | A12        |
| CYP78A7  | Gh_A02G1295.1 | 91.28   | CYP78A7   | Cytochrome P450 78A7        | Gossypium hirsutum | NAU      | A02        |
| CYP78A7  | Gh_D03G1507.1 | 89.74   | CYP75A2   | Flavonoid 3',5'-hydroxylase | Gossypium hirsutum | NAU      | D03        |
| CYP78A7  | Gh_D03G0436.1 | 89.35   | CYP78A7   | Cytochrome P450 78A7        | Gossypium hirsutum | NAU      | D03        |
| CYP78A7  | Gh_A06G0999.1 | 86.66   | CYP78A7   | Cytochrome P450 78A7        | Gossypium hirsutum | NAU      | A06        |
| CYP78A7  | Gh_D03G1504.1 | 86.27   | CYP75A2   | Flavonoid 3',5'-hydroxylase | Gossypium hirsutum | NAU      | D03        |
| CYP78A7  | Gh_A08G0963.1 | 83.96   | CYP78A3   | Cytochrome P450 78A3        | Gossypium hirsutum | NAU      | A08        |

Showing 1 to 10 of 10 rows

**Figure S4-3: Snapshots of the BLAST page.** This page mainly contains an embed SequenceServer App[1], a powerful BLAST front-end. After finishing the BLAST search, CottonFGD would automatically extract target gene IDs for each query sequence and rendered them in a table. This snapshot displayed the BLAST result using protein sequences of *CYP78A7* as query to search against all the *G. hirsutum* proteins with an E-value of 1e-05 and returning top 10 hits.

Navigation Bar

## Search for Cotton Genes by Key Words ?

By Gene ID/Name | By Protein Domain | By Function | By Expression

**Gene Information**

Search Content:

e.g.

- Gh\_D07G0123
- CotAD\_04554
- GOBAR\_AA16059
- Cotton\_A\_05687
- Gorai.013G264100
- Cotton\_D\_gene\_10040019
- ACT
- actin

**Species**

Select Species

- Gossypium hirsutum* (AD<sub>1</sub>, upland cotton), NAU assembly
- Gossypium hirsutum* (AD<sub>1</sub>, upland cotton), BGI assembly
- Gossypium barbadense* (AD<sub>2</sub>, sea-island cotton), NAU assembly
- Gossypium raimondii* (D<sub>5</sub>), JGI assembly
- Gossypium raimondii* (D<sub>5</sub>), BGI assembly
- Gossypium arboreum* (A<sub>2</sub>, tree cotton), BGI assembly

Submit Reset

Input ID/name

Select species

### Search Result

159 results are found.

Select & Analysis | Select & BLAST | Select & Phylogenetic Tree Build | Select & Store | Search

| Gene ID     | Gene Name | Description                                      | Species                   | Assembly | Chromosome |
|-------------|-----------|--------------------------------------------------|---------------------------|----------|------------|
| Gh_D12G0311 | ADF5      | Actin-depolymerizing factor 5                    | <i>Gossypium hirsutum</i> | NAU      | D12        |
| Gh_D06G0509 | ARP6      | Actin-related protein 6                          | <i>Gossypium hirsutum</i> | NAU      | D06        |
| Gh_D09G1029 | SCAB1     | Stomatal closure-related actin-binding protein 1 | <i>Gossypium hirsutum</i> | NAU      | D09        |
| Gh_A03G1149 | ARP3      | Actin-related protein 3                          | <i>Gossypium hirsutum</i> | NAU      | A03        |
| Gh_A05G2093 | At1g71790 | Probable F-actin-capping protein subunit beta    | <i>Gossypium hirsutum</i> | NAU      | A05        |
| Gh_D04G0598 | AC58      | Actin-58                                         | <i>Gossypium hirsutum</i> | NAU      | D04        |
| Gh_D08G0978 | ARPC3     | Actin-related protein 2/3 complex subunit 3      | <i>Gossypium hirsutum</i> | NAU      | D08        |
| Gh_D03G1211 | MA        | Actin                                            | <i>Gossypium hirsutum</i> | NAU      | D03        |
| Gh_D03G1240 | ADF1      | Actin-depolymerizing factor 1                    | <i>Gossypium hirsutum</i> | NAU      | D03        |
| Gh_A05G0607 | SCAB1     | Stomatal closure-related actin-binding protein 1 | <i>Gossypium hirsutum</i> | NAU      | A05        |

Showing 1 to 10 of 159 rows | 10 records per page | 1 2 3 4 5 ... 16

Result gene list table

**Figure S4-4: Snapshots of the Search page: search by gene ID/name.** This snapshot displayed 159 *G. hirsutum* genes using keyword “actin” as gene name search.

## Search for Cotton Genes by Key Words ?

By Gene ID/Name | By Protein Domain | By Function | By Expression

**Domain Information**

Domain Database: Pfam

Search Content: Thioesterase

e.g.

- PF03061
- PS00036
- 4HBT
- Thioesterase

**Species**

Select Species

- Gossypium hirsutum* (AD<sub>1</sub>, upland cotton), NAU assembly
- Gossypium hirsutum* (AD<sub>1</sub>, upland cotton), BGI assembly
- Gossypium barbadense* (AD<sub>2</sub>, sea-island cotton), NAU assembly
- Gossypium raimondii* (D<sub>5</sub>), JGI assembly
- Gossypium raimondii* (D<sub>5</sub>), BGI assembly
- Gossypium arboreum* (A<sub>2</sub>, tree cotton), BGI assembly

Submit Reset

Input domain ID/name (might be fuzzy)

Select species

## Search Result

### Domain List

Select & Fetch Gene Search

| <input type="checkbox"/> Domain Accession   | Domain Description                           | Exist in Cotton? |
|---------------------------------------------|----------------------------------------------|------------------|
| <input type="checkbox"/> PF00975            | Thioesterase; Thioesterase domain            | No               |
| <input type="checkbox"/> PF01643            | Acyl-ACP_TE; Acyl-ACP thioesterase           | Yes              |
| <input type="checkbox"/> PF02089            | Palm_thioest; Palmitoyl protein thioesterase | Yes              |
| <input type="checkbox"/> PF02551            | Acyl_CoA_thio; Acyl-CoA thioesterase         | No               |
| <input checked="" type="checkbox"/> PF03061 | 4HBT; Thioesterase superfamily               | Yes              |
| <input type="checkbox"/> PF09500            | YliD_C; Putative thioesterase (yliD_C-term)  | No               |
| <input type="checkbox"/> PF10862            | FcoT; FcoT-like thioesterase domain          | No               |
| <input type="checkbox"/> PF12590            | Acyl-thio_N; Acyl-ATP thioesterase           | Yes              |
| <input checked="" type="checkbox"/> PF13279 | 4HBT_2; Thioesterase-like superfamily        | Yes              |
| <input checked="" type="checkbox"/> PF13622 | 4HBT_3; Thioesterase-like superfamily        | Yes              |

Showing 1 to 10 of 10 rows

Step 1: Display all possible domains in selected domain database (e.g. Pfam) Users would select their wished items and perform a secondary search.

## Search Result

### Associated Proteins List

30 results are found.

Select & Analysis | Select & BLAST | Select & Phylogenetic Tree Build | Select & Store Search

| <input type="checkbox"/> Protein ID    | Gene Name | Species                   | Assembly | Domain Accession |
|----------------------------------------|-----------|---------------------------|----------|------------------|
| <input type="checkbox"/> Gh_A02G0603.1 | DHNAT1    | <i>Gossypium hirsutum</i> | NAU      | PF03061 (1);     |
| <input type="checkbox"/> Gh_A03G0409.1 | ACOT13    | <i>Gossypium hirsutum</i> | NAU      | PF03061 (1);     |
| <input type="checkbox"/> Gh_A04G0840.1 | slI0410   | <i>Gossypium hirsutum</i> | NAU      | PF03061 (1);     |
| <input type="checkbox"/> Gh_A04G0841.1 | NA        | <i>Gossypium hirsutum</i> | NAU      | PF03061 (1);     |
| <input type="checkbox"/> Gh_A05G0760.1 | ACOT13    | <i>Gossypium hirsutum</i> | NAU      | PF03061 (1);     |
| <input type="checkbox"/> Gh_A05G3848.1 | ACOT13    | <i>Gossypium hirsutum</i> | NAU      | PF03061 (1);     |
| <input type="checkbox"/> Gh_A08G1159.1 | ACOT13    | <i>Gossypium hirsutum</i> | NAU      | PF03061 (1);     |
| <input type="checkbox"/> Gh_A09G0781.1 | Ascc1     | <i>Gossypium hirsutum</i> | NAU      | PF03061 (2);     |
| <input type="checkbox"/> Gh_A09G0782.1 | NA        | <i>Gossypium hirsutum</i> | NAU      | PF03061 (1);     |
| <input type="checkbox"/> Gh_A09G0783.1 | NA        | <i>Gossypium hirsutum</i> | NAU      | PF03061 (2);     |

Showing 1 to 10 of 30 rows 10 records per page

Step 2: Result gene list table based on users' selection



**Figure S4-5: Snapshots of the Search page: search by domain or function annotations.** As name match might be fuzzy, CottonFGD uses a two-step search method. This snapshot displayed searching *G. hirsutum* genes containing “Thioesterase” domain. The same method is also used for function (GO/InterPro/pathway) search.

## Search for Cotton Genes by Key Words ?

By Gene ID/Name   By Protein Domain   By Function   By Expression

---

**Expression Parameter**

FPKM Vaule Cutoff  ✓

---

**Expressed In**

*Gossypium hirsutum* ▾

*Gossypium raimondii* ▾

*Gossypium arboreum* ▾

*Gossypium barbadense* ▾

Fiber development, HAU, time-series (*Gossypium barbadense*)

Check All

Ovule in anthesis    
  Fiber in 10 days post-anthesis    
  Fiber in 20 days post-anthesis

Tissue and Organ (*Gossypium barbadense*)

Check All

Anther      Fiber      Leaf      Ovule  
 Petal      Root      Stem      Stigma

---

**Species**

Select Species

*Gossypium hirsutum* (AD<sub>1</sub>, upland cotton), NAU assembly  
 *Gossypium hirsutum* (AD<sub>1</sub>, upland cotton), BGI assembly  
 *Gossypium barbadense* (AD<sub>2</sub>, sea-island cotton), NAU assembly  
 *Gossypium raimondii* (D<sub>5</sub>), JGI assembly  
 *Gossypium raimondii* (D<sub>5</sub>), BGI assembly  
 *Gossypium arboreum* (A<sub>2</sub>, tree cotton), BGI assembly

 

Define expression thresholds

Select searched experiments (showing partial option only)

Select searched experiments

### Search Result

#### Genes Expressed in Selected Experiments

32809 results are found. ✕

Select & Analysis   Select & BLAST   Select & Phylogenetic Tree Build   Select & Store           

| <input type="checkbox"/> Protein ID      | Petal |
|------------------------------------------|-------|
| <input type="checkbox"/> GOBAR_AA00003.1 | 1.41  |
| <input type="checkbox"/> GOBAR_AA00020.1 | 3.86  |
| <input type="checkbox"/> GOBAR_AA00027.1 | 1.40  |
| <input type="checkbox"/> GOBAR_AA00028.1 | 8.87  |
| <input type="checkbox"/> GOBAR_AA00030.1 | 25.13 |
| <input type="checkbox"/> GOBAR_AA00031.1 | 97.31 |

Result gene list table expressed in selected experiments

**Figure S4-6: Snapshots of the Search page: search by gene expression profiles.**

The expression FPKM threshold could be customized (default value is 1). CottonFGD would display a list of genes expressed in all the selected experiments. This snapshot displayed searching *G. barbadense* genes expressed in petal.

## References

1. Priyam A, Woodcroft BJ, Rai V, Munagala A, Moghul I, Ter F, Gibbins MA, Moon H, Leonard G, Rumpf W: **Sequenceserver: a modern graphical user interface for custom BLAST databases.** *Biorxiv* 2015:033142.
