# Supplementary material for: CottonFGD: an integrated functional genomics database for cotton
Source: PubMed Central journal article supplement (PMC5465443; doi:10.1186/s12870-017-1039-x), 2017-06-08
Supplement: 12870_2017_1039_MOESM5_ESM.pdf [file 12870_2017_1039_MOESM5_ESM.pdf]

## **Addition File 5: Snapshots of the profile module**

|                                                                                     |    |
|-------------------------------------------------------------------------------------|----|
| Figure S5-1. Snapshots of the gene profile page. ....                               | 2  |
| Figure S5-2. Snapshots of the transcript profile page: Basic information. ....      | 3  |
| Figure S5-3. Snapshots of the transcript profile page: DNA/protein statistics. .... | 4  |
| Figure S5-4. Snapshots of the transcript profile page: Exon-intron structure. ....  | 5  |
| Figure S5-5. Snapshots of the transcript profile page: Protein domain. ....         | 6  |
| Figure S5-6. Snapshots of the transcript profile page: Homology. ....               | 7  |
| Figure S5-7. Snapshots of the transcript profile page: Function. ....               | 8  |
| Figure S5-8. Snapshots of the transcript profile page: Expression. ....             | 10 |
| Figure S5-9. Snapshots of the transcript profile page: Variation. ....              | 12 |

## Gene Gh\_A01G0139

### Basic Information of this Gene

|                                                                                                          |                                                                |
|----------------------------------------------------------------------------------------------------------|----------------------------------------------------------------|
| Gene ID                                                                                                  | Gh_A01G0139                                                    |
| Gene Name                                                                                                | GLK1                                                           |
| Gene Description                                                                                         | Transcription activator GLK1                                   |
| Other Description from: NAU-swissprot                                                                    | Q9SIV3 <a href="#">GLK1_ARATH</a> Transcription activator GLK1 |
| Other Description from: NAU-trembl                                                                       | I1LUI9 <a href="#">I1LUI9_SOYBN</a> Uncharacterized protein    |
| Species                                                                                                  | <i>Gossypium hirsutum</i> , NAU assembly                       |
| Genomic Location                                                                                         | A01 : 1,284,402-1,286,452 :                                    |
| Genomic DNA Length(bp)  | 2,051 <a href="#">View</a> <a href="#">Download</a>            |
| JBrowse Links                                                                                            | <a href="#">JBrowse</a>                                        |

- Basic information:
- ID/Name
  - Description (both from our annotation and source data provider)
  - Species
  - Location
  - Sequence

### Associated Transcripts

| Transcript ID | Transcript Type | Transcript Length (bp) | CDS Length (bp) | Principle Transcript? |
|---------------|-----------------|------------------------|-----------------|-----------------------|
| Gh_A01G0139.1 | protein_coding  | 1,275                  | 1,275           | Yes                   |

- Associated transcript: single or multiple

### Genomic Context

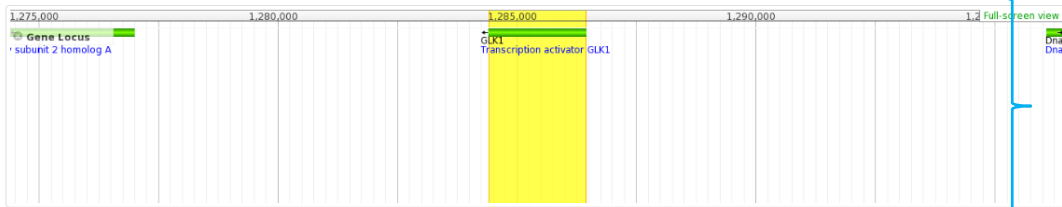

- Genomic Context View: surround 10kb region

### Cross-Database References

**CottonGen** 

- [Transcript Profile](#)
- [JBrowse](#)

**ccNet** 

- [Transcript Profile](#)
- [UCSC Browser](#)
- [Co-expression Network](#)

**PlantTFDB** 

- [Transcript Profile](#)

- Cross database reference

**Figure S5-1. Snapshots of the gene profile page.** This snapshot displayed profile pages of gene Gh\_A01G0139 (*GLK1*) in *G. hirsutum* (NAU assembly).

Navigati  
on bar

## Transcript Gh\_A01G0139.1

Basic Information

DNA/Protein Statistics

Exon-Intron Structure

Protein Domain

Homology

Function ▾

Expression

Variation

### Basic Information

|                                                                                                           |                                                                                                                                                                                                                         |
|-----------------------------------------------------------------------------------------------------------|-------------------------------------------------------------------------------------------------------------------------------------------------------------------------------------------------------------------------|
| Correspond Gene                                                                                           | Gh_A01G0139                                                                                                                                                                                                             |
| Name                                                                                                      | GLK1                                                                                                                                                                                                                    |
| Description                                                                                               | Transcription activator GLK1                                                                                                                                                                                            |
| UniProt (Swiss-Prot) ID  | Q9SIV3                                                                                                                                 |
| Other Description from: NAU-swissprot                                                                     | Q9SIV3  GLK1_ARATH Transcription activator GLK1                                                                                        |
| Other Description from: NAU-trembl                                                                        | I1LUI9  I1LUI9_SOYBN Uncharacterized protein                                                                                           |
| Species                                                                                                   | <i>Gossypium hirsutum</i> , NAU assembly                                                                                                                                                                                |
| Genomic Location                                                                                          | A01 : 1284402-1286452 : -                                                                                                                                                                                               |
| JBrowse Links                                                                                             |                                                                                                                                        |
| Transcript Length(bp)    | 1,275 <a href="#">View</a>  <a href="#">Download</a>  |
| CDS Length(bp)           | 1,275 <a href="#">View</a>  <a href="#">Download</a>  |
| Protein Length(aa)       | 424 <a href="#">View</a>  <a href="#">Download</a>    |

### Cross-Database References

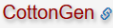 

- [Transcript Profile](#) 
- [JBrowse](#) 

 

- [Transcript Profile](#) 
- [UCSC Browser](#) 
- [Co-expression Network](#) 

 

- [Transcript Profile](#) 

**Figure S5-2. Snapshots of the transcript profile page: Basic information.** This snapshot displayed ID/name, transcript/CDS/protein sequences and cross-database references of transcript Gh\_A01G0139.1 (*GLK1*) in *G. hirsutum* (NAU assembly).

## Transcript Gh\_A01G0139.1

Basic Information DNA/Protein Statistics Exon-Intron Structure Protein Domain Homology Function Expression Variation

### CDS Statistics

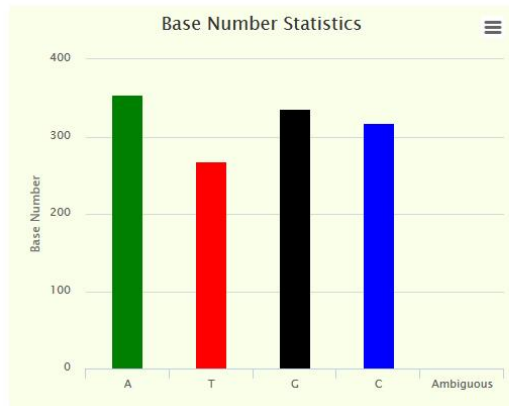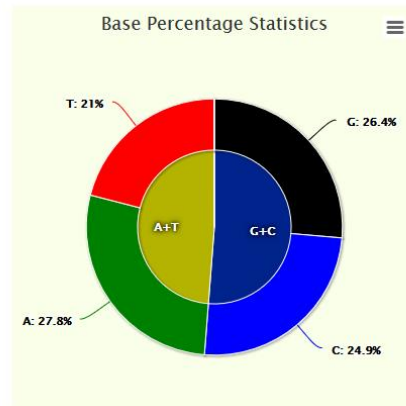

CDS statistics:  
base composition

### Protein Statistics

|                             |                     |       |
|-----------------------------|---------------------|-------|
| Residue Composition         | All Residues        | 424   |
|                             | Ambiguous Residues  | 0     |
|                             | Basic residues (%)  | 16.0% |
|                             | Acidic residues (%) | 13.4% |
| Molecular Weight (kDa)      | 46.624              |       |
| Charge                      | -0.5                |       |
| Isoelectric Point           | 6.474               |       |
| Grand Average of Hydropathy | -0.677              |       |

Protein statistics:  
residue composition  
& physical/chemical  
Properties

**Figure S5-3. Snapshots of the transcript profile page: DNA/protein statistics.** This snapshot displayed base composition, protein residue composition and protein physical/chemical properties of transcript Gh\_A01G0139.1 (*GLK1*) in *G. hirsutum* (NAU assembly).

## Transcript Gh\_A01G0139.1

Basic Information
DNA/Protein Statistics
Exon-Intron Structure
Protein Domain
Homology
Function ▾
Expression
Variation

### Exon-Intron Structure

Statistics

| No. 5' UTR | No. CDS | No. 3' UTR | No. Exon | No. Intron |
|------------|---------|------------|----------|------------|
| 0          | 6       | 0          | 6        | 5          |

Sequences

| ID                                                   | Type   | Chromosome | Start     | End       | Strand | Phase | Length | RNA-seq Junction Support | Sequence                                                                                                                                                                                                                                                                                                                                                      |
|------------------------------------------------------|--------|------------|-----------|-----------|--------|-------|--------|--------------------------|---------------------------------------------------------------------------------------------------------------------------------------------------------------------------------------------------------------------------------------------------------------------------------------------------------------------------------------------------------------|
| 5' upstream sequence ▲                               |        |            |           |           |        |       |        |                          |                                                                                                                                                                                                                                                                                                                                                               |
| Gh_A01G0139.1:CDS:1                                  | CDS    | A01        | 1,285,997 | 1,286,452 | -      | 0     | 456    | -                        | .....tcaatcttgaaggagcaaaaaagaagggaaaaaaaaaagcttgaatta                                                                                                                                                                                                                                                                                                         |
| Gh_A01G0139.1:intron:1                               | intron | A01        | 1,285,841 | 1,285,996 | -      | .     | 156    | 3,303                    | gtaactgatactggatgttttaggt.....tctcttatttttgaattgtttgaag                                                                                                                                                                                                                                                                                                       |
| Gh_A01G0139.1:CDS:2                                  | CDS    | A01        | 1,285,700 | 1,285,840 | -      | 0     | 141    | -                        | GTGGATTGGACGCCGAGCTTCACCGAAGTTTGTACAACCGGTGGAGCAGCTCGGGGTG<br>GATAAGCGGTGCCGTCGAGAATTTAGAGCTTATGGGAATTGATGTCTCACTGCCCAT<br>AACATCGCCAGCCATCTTCAA                                                                                                                                                                                                              |
| Gh_A01G0139.1:intron:2                               | intron | A01        | 1,285,566 | 1,285,699 | -      | .     | 134    | 5,042                    | gtaaatataattataaccattaatt.....gttataattatgttttgggtgcaag                                                                                                                                                                                                                                                                                                       |
| Gh_A01G0139.1:CDS:3                                  | CDS    | A01        | 1,285,221 | 1,285,565 | -      | 0     | 345    | -                        | AAATATAGATCTCATAGGAAGCAITTTACTAGCTCGTGAAGCGGAGCGGCAAGTTGGATA<br>CACAGACGGCRAATATACGCGCGCCTACCGCGTTTGGTGGAGGAGGAGCGAGATGTG<br>AACCATGGCTTCCACCACAAATGGSTTTCCCGCCATCGGCTTCAACCATGACCCACAG<br>AACCAACATTTAGGCCATTTGATGTATGGGGTCAITCCCACTATGATCAGCTATAATG<br>CACTTATGGCCAAACACTTAGCACCCCTCCCGCACCACCGCCAGCTTGGGGACT<br>ACACCACGCGCAGCCCTAGCTTTTGGCACCATCAGCACCCGT |
| Gh_A01G0139.1:intron:3                               | intron | A01        | 1,285,137 | 1,285,220 | -      | .     | 84     | 2,024                    | gtatgctctgtgcaaccttttcttt.....tgttttttttttttgggttattag                                                                                                                                                                                                                                                                                                        |
| Gh_A01G0139.1:CDS:4                                  | CDS    | A01        | 1,285,074 | 1,285,136 | -      | 0     | 63     | -                        | GTACCAAAATGGACAAACCCCGGGAACCGTGTTCCTCCCGCATTGACGCGGCACCA<br>ACG                                                                                                                                                                                                                                                                                               |
| Gh_A01G0139.1:intron:4                               | intron | A01        | 1,284,958 | 1,285,073 | -      | .     | 116    | 2,821                    | gtaaacogttcaactactctgttt.....atgttggctataattatcatcgag                                                                                                                                                                                                                                                                                                         |
| Gh_A01G0139.1:CDS:5                                  | CDS    | A01        | 1,284,838 | 1,284,957 | -      | 0     | 120    | -                        | AGAITTGGTGTAGTACCGGTGCGGGCAITTCCTCCTCACCATGCAATGTACAAAGGTGAC<br>ACCGGCATCGGTGTCCCTGCCAGCCAATACGTCCACCCTCTCTGTGACTTACATCCG                                                                                                                                                                                                                                     |
| Gh_A01G0139.1:intron:5                               | intron | A01        | 1,284,552 | 1,284,837 | -      | .     | 286    | 2,081                    | gttagtagcttataactttgttatca.....tatatctacaanaattatgtgacacag                                                                                                                                                                                                                                                                                                    |
| Gh_A01G0139.1:CDS:6                                  | CDS    | A01        | 1,284,402 | 1,284,551 | -      | 0     | 150    | -                        | TCGAAAGAGACATGATGCCGCTATCGGGGACGTTTTATCGAAACGGTGCCTGCCGCT<br>CCTATCGGGTGAACCCGCAATCAACGGATGGTGTGTTTGGTGGAGCTACAAGTCAAGGA<br>GTCCAAAGATTCACCTTCTTGTGCTTGA                                                                                                                                                                                                      |
| 3' downstream sequence ▲                             |        |            |           |           |        |       |        |                          |                                                                                                                                                                                                                                                                                                                                                               |
| accgctccggccacagcgggcaaaactgttaactccgcgacatatct..... |        |            |           |           |        |       |        |                          |                                                                                                                                                                                                                                                                                                                                                               |

Download Sequences

Up/Downstream

1000

bp

Number statistics

Sequence display

Sequence download

**Figure S5-4. Snapshots of the transcript profile page: Exon-intron structure.** This snapshot displayed all the sequences of each exon and intron in transcript Gh\_A01G0139.1 (*GLK1*) in *G. hirsutum* (NAU assembly). Users can download these sequences together with upstream/downstream sequences in custom length.

# Transcript Gh\_A01G0139.1

Basic Information DNA/Protein Statistics Exon-Intron Structure Protein Domain Homology Function Expression Variation

## Domain Database

|                       |   |
|-----------------------|---|
| Database: Coils       | 1 |
| Database: Gene3D      | 1 |
| Database: PANTHER     | 1 |
| Database: Pfam        | 1 |
| Database: SUPERFAMILY | 1 |
| Database: TIGRFAM     | 1 |
| Database: ProSite     | 1 |

Database list

## Domain List in Database [Pfam]

Search [ ] [ ] [ ]

| Domain Database | Domain Region | Domain Accession | Domain Description                           | E-value |
|-----------------|---------------|------------------|----------------------------------------------|---------|
| Pfam            | 153-202       | PF00249          | Myb_DNA-binding; Myb-like DNA-binding domain | 6.4e-8  |

Domain list in selected database

Showing 1 to 1 of 1 rows

## Domain View

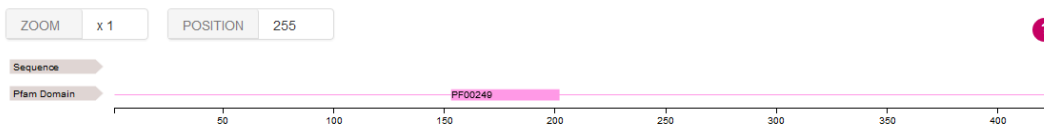

Domain region view in protein sequences

**Figure S5-5. Snapshots of the transcript profile page: Protein domain.** This snapshot displayed domains in protein Gh\_A01G0139.1 (*GLK1*) in *G. hirsutum* (NAU assembly). Users can switch among different domain databases.

# Transcript Gh\_A01G0139.1

Basic Information DNA/Protein Statistics Exon-Intron Structure Protein Domain Homology Function Expression Variation

## Homologs List

### Orthologs Among Other Plants

Select & Draw Alignment

| <input type="checkbox"/>            | Subject Species                            | Subject ID                  | Subject Length (aa) | Query Coverage (%) | E value | Identity (%) |
|-------------------------------------|--------------------------------------------|-----------------------------|---------------------|--------------------|---------|--------------|
| <input checked="" type="checkbox"/> | <i>Gossypium barbadense</i> , NAU assembly | GOBAR_AA28660.1             | 424                 | 100                | 0       | 100          |
| <input checked="" type="checkbox"/> | <i>Gossypium raimondii</i> , JGI assembly  | Gorai.002G020300.1          | 424                 | 100                | 0       | 97           |
| <input type="checkbox"/>            | <i>Gossypium raimondii</i> , BGI assembly  | Cotton_D_gene_10018000.1    | 424                 | 100                | 0       | 97           |
| <input checked="" type="checkbox"/> | <i>Gossypium arboreum</i> , BGI assembly   | Cotton_A_00064.1            | 424                 | 100                | 0       | 99           |
| <input checked="" type="checkbox"/> | <i>Theobroma cacao</i>                     | Thecc1EG008193t1            | 427                 | 100                | 0       | 76           |
| <input type="checkbox"/>            | <i>Arabidopsis thaliana</i>                | AT2G20570.2                 | 437                 | 100                | 8e-105  | 52           |
| <input type="checkbox"/>            | <i>Brassica rapa</i>                       | Brara.I04696.1.p            | 417                 | 100                | 5e-97   | 50           |
| <input type="checkbox"/>            | <i>Carica papaya</i>                       | evm.model.supercontig_83.93 | 446                 | 99                 | 4e-98   | 51           |
| <input type="checkbox"/>            | <i>Citrus sinensis</i>                     | orange1.1g013528m           | 442                 | 100                | 2e-171  | 65           |
| <input type="checkbox"/>            | <i>Populus trichocarpa</i>                 | Potri.T098900.1             | 435                 | 100                | 3e-165  | 67           |

Showing 1 to 10 of 26 rows 10 records per page

Users would select what they want and draw alignments

Orthologs in other *Gossypium* and other plants

### Multiple Sequence Alignment for Orthologs

Import Sorting Filter Selection Vis. elements Color scheme Extras Export Help

1 Ghir(NAU) M L A V S P L R N N T S T D D D E G E M E S T F T I V S S D E F P D F A D G N L L E S I D F D D L F L S I G V D G D V L P D L E M D P E I  
2 Garb(BGI) M L A V S P L R N N T S T D D D E G E M E S T F T I S S D E F P D F A D G N L L E S I D F D D L F L S I G V D G D V L P D L E M D P E I  
3 Gbar(NAU) M L A V S P L R N N T S T D D D E G E M E S T F T I V S S D E F P D F A D G N L L E S I D F D D L F L S I G V D G D V L P D L E M D P E I  
4 Grai(JGI) M L A V S P L R N N T S K D D D E G E M E S T F T I S S D E F P D F A D G N L L E S I D F D D L F L S I N E G D M L P D L E M D P E I  
5 Tcac M L A V S P L R N T T N D E N K G E M S - F T I S S E E F P D F A D G N L L E S I D F D D L F V S I N E G D M L P D L E M D P E I

An interactive MSA viewer drawing alignments

### Paralog within this Species

Search

| Subject Species                          | Subject ID    | Subject Length (aa) | Query Coverage (%) | E value | Identity (%) |
|------------------------------------------|---------------|---------------------|--------------------|---------|--------------|
| <i>Gossypium hirsutum</i> , NAU assembly | Gh_D01G0183.1 | 424                 | 100                | 0       | 96           |

Show paralog within the same species (assembly)

### Assembly Conversion

Search

| Subject Species                          | Subject ID    | Subject Length (aa) | Query Coverage (%) | E value | Identity (%) |
|------------------------------------------|---------------|---------------------|--------------------|---------|--------------|
| <i>Gossypium hirsutum</i> , BGI assembly | CotAD_24836.1 | 424                 | 100                | 0       | 97           |

Switch among different assemblies in the same species

### Cross Database References

PHD

• [Link to PHD database](#)

Links to PHD database based on the ortholog in *Arabidopsis thaliana*

**Figure S5-6. Snapshots of the transcript profile page: Homology.** This snapshot displayed orthologs and paralogs in protein Gh\_A01G0139.1 (*GLK1*) in *G. hirsutum* (NAU assembly). Users can select several target species and CottonFGD would draw an interactive alignment.

## Transcript Gh\_A01G0139.1

Basic Information DNA/Protein Statistics Exon-Intron Structure Protein Domain Homology Function Expression Variation

### GO terms

2 GO terms are associated with this protein

| GO Accession | Go Name           | GO Type            | Source               |
|--------------|-------------------|--------------------|----------------------|
| GO:0003677   | DNA binding       | Molecular Function | ColtonFGD; CottonGen |
| GO:0003682   | chromatin binding | Molecular Function | CottonGen; NAU       |

List associated GO terms from both our annotation and other provider

### GO Graphs for Terms Associated with this Protein

Molecular Function

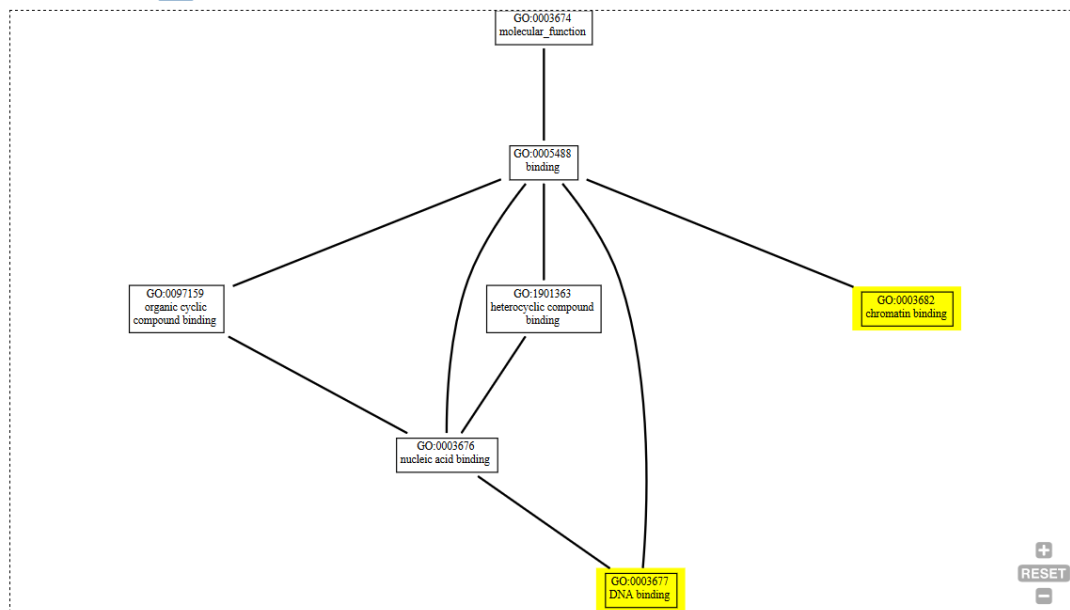

Graphs showing the relationship between associated GO terms and their parent terms

**Figure S5-7. Snapshots of the transcript profile page: Function.** This snapshot displayed associated GO terms in protein Gh\_A01G0139.1 (*GLKI*) in *G. hirsutum* (NAU assembly). Interactive graphs showing the relationship between associated GO terms and their parent terms were also presented in three categories: Molecular Function, Biology Process and Cell Component. (This gene only has GO terms in “Molecular Function”).



# Transcript Gh\_A01G0139.1

Basic Information DNA/Protein Statistics Exon-Intron Structure Protein Domain Homology Function Expression Variation

## Expression Groups

|                                                                                    |   |
|------------------------------------------------------------------------------------|---|
| Cytoplasmic male sterility (CMS) study of strain JA and JB, sporogenous cell stage | 1 |
| Fiber development, time-series                                                     | 2 |
| Ovule development, time-series                                                     | 3 |
| Seed germination, cotyledon time-series                                            | 5 |
| Seed germination, organ comparison                                                 | 2 |
| Seed germination, root time-series                                                 | 2 |
| Seed germination, seed time-series                                                 | 3 |
| Stress experiment, Cold treat in time-series                                       | 4 |
| Stress experiment, compare with control                                            | 5 |
| Stress experiment, Hot treat in time-series                                        | 4 |
| Stress experiment, PEG treat in time-series                                        | 4 |
| Stress experiment, Salt treat in time-series                                       | 4 |
| Tissue and Organ                                                                   | 5 |

Experiment List  
Users would  
select what they  
want

## [Stress experiment, Salt treat in time-series] Expression Levels

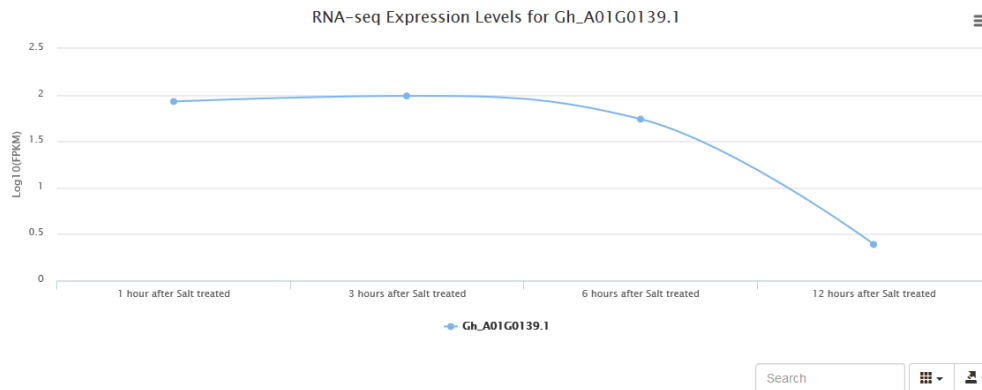

Expression  
levels (FPKM)  
in selected  
experiment

| Project   | Run         | Sample                      | FPKM  |
|-----------|-------------|-----------------------------|-------|
| SRP044705 | SRR1768512; | 1 hour after Salt treated   | 84.27 |
| SRP044705 | SRR1768513; | 3 hours after Salt treated  | 96.93 |
| SRP044705 | SRR1768514; | 6 hours after Salt treated  | 55.27 |
| SRP044705 | SRR1768515; | 12 hours after Salt treated | 2.45  |

Showing 1 to 4 of 4 rows

## [Stress experiment, Salt treat in time-series] Expression Difference

WARNING: No Significant Expression Difference in this group.

## JBrowse View

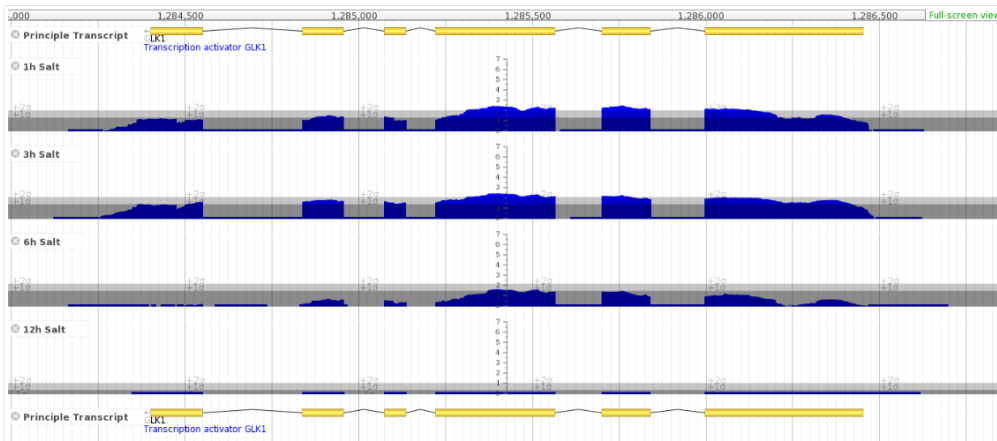

Visualization  
of RNA-seq  
coverages in  
selected  
experiment

**Figure S5-8. Snapshots of the transcript profile page: Expression.** This snapshot displayed the expression pattern of transcript Gh\_A01G0139.1 (*GLKI*) in *G. hirsutum* (NAU assembly) in salt treated experiment compared in time-series (1h, 3h, 6h, 12h). CottonFGD would display a JBrowse snapshot of relevant RNA-seq coverages.



**Figure S5-9. Snapshots of the transcript profile page: Variation** (currently we only implemented SNPs in *G. hirsutum* NAU assembly and *G. barbadense* NAU assembly). This snapshot displayed the SNPs of transcript Gh\_A01G0139.1 (*GLK1*) in *G. hirsutum* (NAU assembly). Length of upstream/downstream regions, parameters of population genetics analysis (currently only nucleotide diversity and Tajima's D are implemented) and sample selection could be customized.
