# Supplementary material for: CottonFGD: an integrated functional genomics database for cotton
Source: PubMed Central journal article supplement (PMC5465443; doi:10.1186/s12870-017-1039-x), 2017-06-08
Supplement: 12870_2017_1039_MOESM6_ESM.pdf [file 12870_2017_1039_MOESM6_ESM.pdf]

## **Addition File 6: Snapshots of the analysis module**

|                                                                                      |    |
|--------------------------------------------------------------------------------------|----|
| Figure S6-1. Snapshots of the analysis page: fetch structure information.....        | 2  |
| Figure S6-2. Snapshots of the analysis page: fetch function information. ....        | 3  |
| Figure S6-3. Snapshots of the analysis page: fetch expression level information..... | 5  |
| Figure S6-4. Snapshots of the analysis page: enrichment analysis.....                | 7  |
| Figure S6-5. Snapshots of the list compare page.....                                 | 9  |
| Figure S6-6. Snapshots of the phylogenetic tree build page.....                      | 10 |

## Analyze Cotton Gene Lists ?

**Input Gene IDs**

Gh\_D11G0676  
Gh\_D02G0715  
Gh\_D06G1428  
Gh\_D10G2193  
Gh\_A12G2323  
Gh\_A01G0120

OR: Upload ID File 浏览... 未选择文件.

**Select Analysis Options**

Feature Sequence Domain Homology Gene Function Gene Expression Enrichment Analysis

Fetch Gene/Transcript Features

Gene Features

Transcript Features

Protein Statistics

Submit Reset

**Search Result**

6 IDs are detected. 6 unique IDs are used.

Among them, 6 IDs are found to have records.

Select & Re-Analysis Select & BLAST Select & Phylogenetic Tree Build Select & Store

Search

| <input type="checkbox"/> | Gene ID     | Transcript Length (bp) | CDS GC Content (%) | Exon Number | Mean Exon Length (bp) | Mean Intron Length (bp) |
|--------------------------|-------------|------------------------|--------------------|-------------|-----------------------|-------------------------|
| <input type="checkbox"/> | Gh_D11G0676 | 426                    | 52.6               | 3           | 142.0                 | 98.5                    |
| <input type="checkbox"/> | Gh_D02G0715 | 978                    | 52.8               | 1           | 978.0                 | No intron               |
| <input type="checkbox"/> | Gh_D06G1428 | 723                    | 46.5               | 2           | 361.5                 | 90.0                    |
| <input type="checkbox"/> | Gh_D10G2193 | 1,506                  | 43.4               | 2           | 753.0                 | 82.0                    |
| <input type="checkbox"/> | Gh_A12G2323 | 555                    | 50.5               | 3           | 185.0                 | 85.5                    |
| <input type="checkbox"/> | Gh_A01G0120 | 765                    | 45.9               | 1           | 765.0                 | No intron               |

Showing 1 to 6 of 6 rows

**Figure S6-1. Snapshots of the analysis page: fetch structure information.** This snapshot displayed fetching transcript structure information in six genes in *G. hirsutum* (NAU assembly). Genes are: Gh\_D11G0676, Gh\_D02G0715, Gh\_D06G1428, Gh\_D10G2193, Gh\_A12G2323 and Gh\_A01G0120. The fetching results are in exactly the same order as the inputted IDs. (Note: this snapshot hid several columns in the result table in order to show the main ones.)

## Analyze Cotton Gene Lists ?

**Input Gene IDs**

Gh\_D11G0676  
 Gh\_D02G0715  
 Gh\_D06G1428  
 Gh\_D10G2193  
 Gh\_A12G2323  
 Gh\_A01G0120

OR: Upload ID File  未选择文件。

**Select Analysis Options**

Feature   Sequence   Domain   Homology   **Gene Function**   Gene Expression   Enrichment Analysis

**Fetch Gene Functions: GO/InterPro/Pathway**

Gene Ontology (GO) Items  
 InterPro Items  
 KEGG Pathway Items

### Search Result

6 IDs are detected. 6 unique IDs are used.

Among them, 3 IDs are found to have records.

| <input type="checkbox"/> | Gene ID     | Principle Transcript ID | Species                   | Assembly | GO Number | Associated GO List                  |
|--------------------------|-------------|-------------------------|---------------------------|----------|-----------|-------------------------------------|
| <input type="checkbox"/> | Gh_D11G0676 | NA                      | NA                        | NA       | NA        | -                                   |
| <input type="checkbox"/> | Gh_D02G0715 | NA                      | NA                        | NA       | NA        | -                                   |
| <input type="checkbox"/> | Gh_D06G1428 | Gh_D06G1428.1           | <i>Gossypium hirsutum</i> | NAU      | 2         | GO:0006508; GO:0008234;             |
| <input type="checkbox"/> | Gh_D10G2193 | Gh_D10G2193.1           | <i>Gossypium hirsutum</i> | NAU      | 1         | GO:0005515;                         |
| <input type="checkbox"/> | Gh_A12G2323 | NA                      | NA                        | NA       | NA        | -                                   |
| <input type="checkbox"/> | Gh_A01G0120 | Gh_A01G0120.1           | <i>Gossypium hirsutum</i> | NAU      | 3         | GO:0005515; GO:0008270; GO:0046872; |

Showing 1 to 6 of 6 rows

Results: genes are listed in the same order as input

**Figure S6-2. Snapshots of the analysis page: fetch function information.** This snapshot displayed fetching associated GO terms in six genes in *G. hirsutum* (NAU assembly). Genes are: Gh\_D11G0676, Gh\_D02G0715, Gh\_D06G1428, Gh\_D10G2193, Gh\_A12G2323 and Gh\_A01G0120. Note that even for genes with no GO terms, they are still listed following the original order. Therefore, it is convenient to fetch different information type separately and then connect them together.

## Analyze Cotton Gene Lists

**Input Gene IDs**

Gh\_D11G0676  
Gh\_D02G0715  
Gh\_D06G1428  
Gh\_D10G2193  
Gh\_A12G2323  
Gh\_A01G0120

OR: Upload ID File  未选择文件.

---

**Select Analysis Options**

Feature Sequence Domain Homology Gene Function **Gene Expression** Enrichment Analysis

**Fetch Gene Expression Levels (FPKM) &**

Select Experiments

Gossypium hirsutum

Stress experiment, compare in time-series (Gossypium hirsutum)

Check All

1 hour after Cold treated  3 hours after Cold treated  6 hours after Cold treated  12 hours after Cold treated  
 1 hour after Hot treated  3 hours after Hot treated  6 hours after Hot treated  12 hours after Hot treated  
 1 hour after PEG treated  3 hours after PEG treated  6 hours after PEG treated  12 hours after PEG treated  
 1 hour after Salt treated  3 hours after Salt treated  6 hours after Salt treated  12 hours after Salt treated

Tissue and Organ (Gossypium hirsutum)

Check All

Calyx  Leaf  Petal  Pistil  
 Root  Stamen  Stem  Torus

Select experiments (showing partial option only)

### Search Result

6 IDs are detected. 6 unique IDs are used.

Among them, 6 IDs are found to have records.

### FPKM Values for each Gene in Selected Experiments

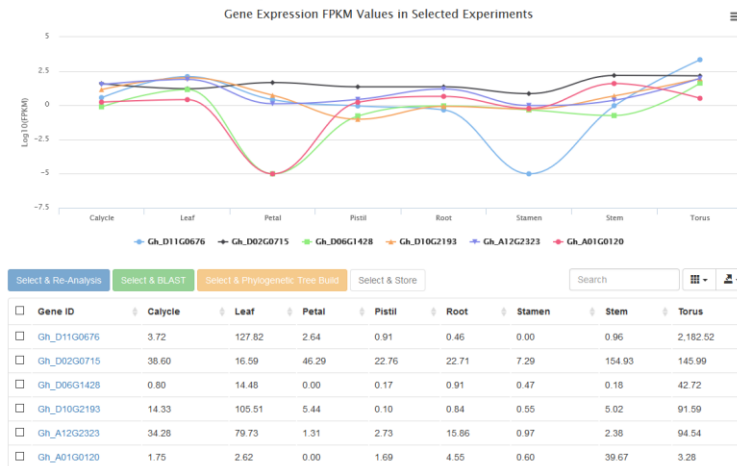

List expression level (FPKM) for each gene in selected experiments

### Clustered Heatmaps for Query Genes in Selected Experiments

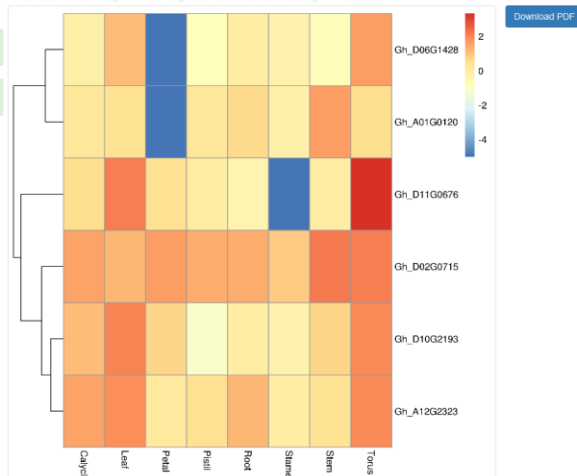

Cluster input genes based on their expression atlas in selected experiments

**Figure S6-3. Snapshots of the analysis page: fetch expression level information.**

This snapshot displayed fetching expression levels (FPKM) in six genes of *G. hirsutum* (NAU assembly) in eight organs. Genes are: Gh\_D11G0676, Gh\_D02G0715, Gh\_D06G1428, Gh\_D10G2193, Gh\_A12G2323 and Gh\_A01G0120. In addition to the result table, CottonFGD will generate a heatmap clustered by the expression patterns for these query genes. The cluster is done by the pheatmap library (<https://cran.r-project.org/web/packages/pheatmap/index.html>).

## Analyze Cotton Gene Lists ?

**Input Gene IDs**

Gh\_D11G0676  
 Gh\_D02G0715  
 Gh\_D06G1428  
 Gh\_D10G2193  
 Gh\_A12G2323  
 Gh\_D02G0169  
 Gh\_A12G1244

OR: Upload ID File  未选择文件。

**Select Analysis Options**

Feature Sequence Domain Homology Gene Function Gene Expression **Enrichment Analysis**

**Enrichment Analysis for GO/InterPro/Pathway ⌵**

**Enrichment Analysis Option**

Gene Ontology  
 InterPro  
 KEGG Pathway

**Species**

*Gossypium hirsutum* (AD<sub>1</sub>, upland cotton), NAU assembly  
 *Gossypium hirsutum* (AD<sub>1</sub>, upland cotton), BGI assembly  
 *Gossypium barbadense* (AD<sub>2</sub>, sea-island cotton), NAU assembly  
 *Gossypium raimondii* (D<sub>3</sub>), JGI assembly  
 *Gossypium raimondii* (D<sub>5</sub>), BGI assembly  
 *Gossypium arboreum* (A<sub>2</sub>, tree cotton), BGI assembly

**Advanced Parameters**

Significance Level  ✓  
 Minimum Gene Number for each Analyzed Term  ✓

Enrichment analysis options

### Search Result

96 IDs are detected. 96 unique IDs are used. ✕

96 IDs in *Gossypium hirsutum* are used to do enrichment analysis. ✕

### Enrichment Item List

Total: 12,273 genes with KEGG Pathway items in *Gossypium hirsutum*  
 Among your input IDs: 33 have matched KEGG Pathway items.  
 Result: 5 enrichment KEGG Pathway items. ✕

Select & Redraw Enrichment Graph

| <input type="checkbox"/> | Accession | Name                                                 | Input Gene Number | All Gene Number | Q-value |
|--------------------------|-----------|------------------------------------------------------|-------------------|-----------------|---------|
| <input type="checkbox"/> | M00137    | Flavanone biosynthesis, phenylalanine => naringenin  | 6 (18.18%)        | 45 (0.37%)      | 2.8e-10 |
| <input type="checkbox"/> | ko00730   | Thiamine metabolism                                  | 4 (12.12%)        | 30 (0.24%)      | 9.0e-8  |
| <input type="checkbox"/> | ko00941   | Flavonoid biosynthesis                               | 4 (12.12%)        | 74 (0.60%)      | 6.3e-6  |
| <input type="checkbox"/> | M00350    | Capsaicin biosynthesis, L-Phenylalanine => Capsaicin | 3 (9.09%)         | 43 (0.35%)      | 1.6e-5  |
| <input type="checkbox"/> | ko01100   | Metabolic pathways                                   | 22 (66.67%)       | 4,137 (33.71%)  | 6.6e-5  |

Showing 1 to 5 of 5 rows

Enrichment terms list

### Plot Gene Percentage in each Enrichment Item

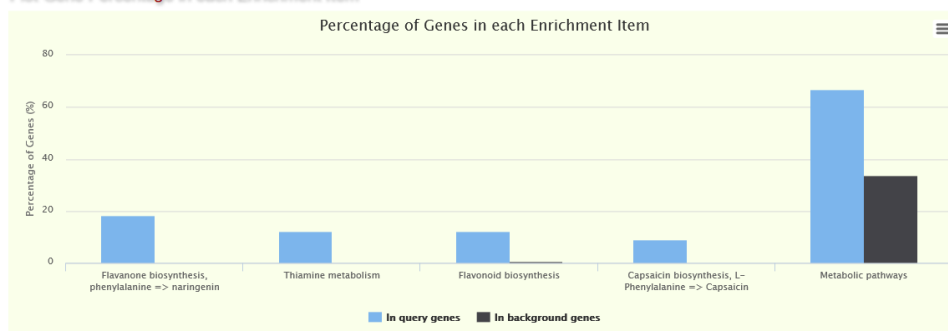

Enrichment terms graph

**Figure S6-4. Snapshots of the analysis page: enrichment analysis.** This snapshot displayed doing KEGG pathway enrichment analysis in 96 genes of *G. hirsutum* (NAU assembly) using  $P < 0.0001$  as thresholds.

## Compare Two Lists & Generate Venn Graph

**List 1**

Title:

ID List:

- Red
- Yellow
- blue
- GREEN
- black
- Yellow
- red

OR Upload ID File:  未选择文件.

**List 2**

Title:

ID List:

- Yellow
- red
- purple
- GREEN
- pink
- orange

OR Upload ID File:  未选择文件.

**Options**

- Sort Lists
- Remove Duplicated Items
- Case insensitive
- Ignore .x, .2... suffix

**Output**

- Intersection
- Union
- Specific in List 1
- Specific in List 2

**See More List Comparison Tools?**

Go to Genvern

- Support up to 7 lists
- More powerful Venn graph generation
- Get intersection results only

Input two lists

## Compare Result

### Original List

**List 1: A**

Number: 5

| ID     |
|--------|
| black  |
| blue   |
| GREEN  |
| Red    |
| Yellow |

Showing 1 to 5 of 5 rows

**List 2: B**

Number: 6

| ID     |
|--------|
| GREEN  |
| orange |
| pink   |
| purple |
| red    |
| Yellow |

Showing 1 to 6 of 6 rows

### Compare List

**Intersection:**

**A And B**

Number: 3

| ID     |
|--------|
| GREEN  |
| Red    |
| Yellow |

Showing 1 to 3 of 3 rows

**Union:**

**A Or B**

Number: 8

| ID     |
|--------|
| black  |
| blue   |
| GREEN  |
| orange |
| pink   |
| purple |
| Red    |
| Yellow |

Showing 1 to 8 of 8 rows

**Specific List 1:**

**A Only**

Number: 2

| ID    |
|-------|
| black |
| blue  |

Showing 1 to 2 of 2 rows

**Specific List 2:**

**B Only**

Number: 3

| ID     |
|--------|
| orange |
| pink   |
| purple |

Showing 1 to 3 of 3 rows

Compare result:  
Intersection  
Union  
Specific

## Venn Graph

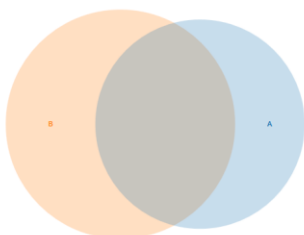

Venn Graph  
showing count  
number



**Figure S6-5. Snapshots of the list compare page.** Note this page only conduct comparisons based on inputted IDs. Therefore, it could be applied to any ID lists instead of restricting on cotton gene IDs.



displayed a phylogenetic tree built by six *BZIP60* (Gh\_A04G0770, Gh\_A04G0769, Gh\_D04G0051, Gh\_A05G2508, Gh\_D05G2786, Gh\_D08G0879) and two *BZIP17* (Gh\_A13G2071, Gh\_D13G0009) genes in *G. hirsutum*.
